# Supplementary material for: Low-Dose Decitabine Assists Human Umbilical Cord-Derived Mesenchymal Stem Cells in Protecting β Cells via the Modulation of the Macrophage Phenotype in Type 2 Diabetic Mice
Source: Stem Cells Int. 2020 Apr 3;2020:4689798. doi: 10.1155/2020/4689798 (PMC7157805; doi:10.1155/2020/4689798)
Supplement: Supplementary Materials — Supplementary Figure 1: identification of T2D mice models. Supplementary Figure 2: identification of bone marrow-derived macrophages (BMDMs) and peritoneal macrophages. Supplementary Table 1: primer sequences of target genes (mouse). [file 4689798.f1.zip]

Archive with 3 entries (3 files):
- mat.4689798.v2.pdf
- Supplementary figure1_SCI_3039856.eps
- Supplementary figure2_SCI_3039857.eps
